# Supplementary material for: Modification effects of meso-hexakis(pentafluorophenyl) [26]hexaphyrin aggregates on the photocatalytic water splitting
Source: Royal Society of Chemistry journal article supplement (doi:10.1039/c4cc05127k), 2014-01-01
Supplement: c4cc05127k1.pdf [file c4cc05127k1.pdf]

## Supporting Information

### Modification Effect of *meso*-Hexakis(pentafluorophenyl) [26]Hexaphyrin Aggregates on the Photocatalytic Water Splitting

Hidehisa Hagiwara,<sup>\*,†,§</sup> Motonori Watanabe,<sup>†</sup> Takeshi Daio,<sup>‡</sup> Shintaro Ida,<sup>†,§</sup> and Tatsumi Ishihara<sup>†,§,‡</sup>

<sup>†</sup>International Institute for Carbon-Neutral Energy Research (I2CNER), Kyushu University, 744 Motooka, Nishi-ku, Fukuoka, 819-0395, Japan

<sup>§</sup>Department of Applied Chemistry, Kyushu University, 744 Motooka, Nishi-ku, Fukuoka, 819-0395, Japan

<sup>‡</sup>International Research Center for Hydrogen Energy, Kyushu University, 744 Motooka, Nishi-ku, Fukuoka, 819-0395, Japan

### Contents

#### a) Experimental procedures

#### b) Figure & Table

**Fig. S1** UV-vis absorption spectra for compounds **1-6** in CH<sub>2</sub>Cl<sub>2</sub> solvent.

**Table S1** Absorption maximum wavelengths and molar absorbance coefficients for synthesized porphyrinoids.

**Fig. S2** XRD patterns for ZnO, GaN, and GaN:ZnO solid solutions prepared in this study (a), and expanded figure (b).

**Fig. S3** TEM images of (a) *meso*-tetrakis(pentafulorophenyl)porphyrin (compound **1**), (b) N-fused pentaphyrin (compound **2**), (c) *meso*-hexakis(pentafluorophenyl) [26] hexaphyrin (compound **3**), (d) *meso*-heptakis(pentafluorophenyl) heptaphyrin (compound **4**) (e) *meso*-octakis(pentafluorophenyl) octaphyrin (compound **5**), and (f) *meso*-nonakis(pentafluorophenyl) nonaphyrin (compound **6**) on IrO<sub>2</sub>-GaN:ZnO photocatalysts.

**Fig. S4** HAADF-STEM images and EDX mapping of Ir M shell (a, b), Rh L shell and Ni K shell (c-e) of Rh (0.1 wt%), NiO (0.1 wt%)/porphyrin **3** (0.5 wt%)/IrO<sub>2</sub>-GaN:ZnO photocatalysts.

**Fig. S5** Dye amount dependency of the photocatalytic activity of hexaphyrin **3** modified GaN:ZnO photocatalysts.

**Fig. S6** <sup>1</sup>H NMR spectra of residual species after water splitting reaction.

**Fig. S7** <sup>1</sup>H NMR spectra of residual species of blank condition (green), bulk hexaphyrin **3** (blue), after deposit of hexaphyrin **3** by solution process (black), and after water splitting reaction (black).

**Fig. S8** Amount of H<sub>2</sub> and O<sub>2</sub> formed on RhO<sub>x</sub> (0.1 wt%), NiO (0.1 wt%)/hexaphyrin **3** (0.5wt%)/IrO<sub>2</sub>(0.1 wt%)-GaN:ZnO as a function of reaction time under a 300 W Xe lamp (Full arc).

**Fig. S9** Photocurrent-potential characteristics of IrO<sub>2</sub>-GaN:ZnO (blue) and hexaphyrin **3**/ IrO<sub>2</sub>-GaN:ZnO electrodes (red) measured (scan rate, 10 mV/s) with chopped light (300 mW/cm<sup>2</sup> Xe lamp, 0.5 Hz).

## Experimental procedures

### Photocatalyst preparation.

A GaN:ZnO solid solution was prepared according to a reported method.<sup>[13]</sup> A mixture of Ga<sub>2</sub>O<sub>3</sub> (Koujundo Chemical Lab. Co., Ltd., 3.0 g) and ZnO (Koujundo Chemical Lab. Co., Ltd., 2.6 g) was heated under NH<sub>3</sub> gas flow (200 mL min<sup>-1</sup>) at 1143 K for 20 h on an alumina boat. The crystal structure of the obtained powder was confirmed as a wurtzite structure by X-ray diffraction (XRD) measurements (Figure S8). The IrO<sub>2</sub> co-catalyst was loaded on the GaN:ZnO powder by an evaporation to dryness method with a Na<sub>2</sub>IrCl<sub>6</sub>•6H<sub>2</sub>O (Wako Pure Chemical Industry) aqueous solution. After calcination at 673 K for 1 h in air, IrO<sub>2</sub> (0.1 wt%)-GaN:ZnO was obtained. Expanded porphyrins were prepared in accordance with the literature.<sup>[12b]</sup> A solution of pentafluorobenzaldehyde (0.51 mL, 4.11 mmol) and pyrrole (0.26 mL, 4.11 mmol) in 60 mL of dichloromethane was placed in a 100 mL round-bottomed flask under nitrogen. To the solution, 30  $\mu$ L of BF<sub>3</sub>OEt<sub>2</sub> (0.26 mmol) was added, and the resulting mixture was stirred for 2 h. After adding DDQ, the solution was stirred for 10 h and then passed through a short alumina column. The reaction mixture was separated by silica gel column chromatography. The obtained expanded porphyrins were purified by recrystallization. The dye modification of IrO<sub>2</sub>-GaN:ZnO was performed by an evaporation to dryness method with pyridine as the solvent. The IrO<sub>2</sub>-GaN:ZnO powder was suspended in dye-solved pyridine (0.5 mM) and the solvent was evaporated to dryness by stirring with a glass rod at 400 K. The amounts of modification dyes were standardized as 0.5 wt% on the amount of IrO<sub>2</sub>-GaN:ZnO in this study. Co-catalysts were loaded on the dye-modified IrO<sub>2</sub>-GaN:ZnO by an evaporation to dryness method with an aqueous solution of Na<sub>3</sub>RhCl<sub>6</sub>•12H<sub>2</sub>O (Mitsuwa Chemicals) and Ni(NO<sub>3</sub>)<sub>2</sub>•6H<sub>2</sub>O (Kanto Chemical). The amounts of co-catalysts on the dye-modified GaN:ZnO photocatalyst were 0.1 wt%. Further details of the photocatalyst are described in the Supplementary Information.

### Photocatalytic water splitting reaction.

Photocatalytic water splitting was performed with a closed circulating glass reactor. The catalyst (50 mg) was suspended in 30 mL of pure water, which was pre-saturated with argon gas. KOH was used to adjust the pH to 11. A quartz reaction cell including photocatalyst suspension was irradiated by a 300 W Xe lamp (Cermex PE300UV, Perkin Elmer Inc.). During the reaction, the suspension was mixed using a magnetic stir bar. Argon gas (10.67 kPa) was used as the circulating carrier gas. The amount of gases formed was measured by a gas chromatograph with a thermal conductivity detector (GC-8A, Shimadzu Corp.), which was connected to a volumetric circulating line with a vacuum pump.

### UV-Vis and Fluorescence spectroscopy.

UV-vis absorption spectra were obtained by a transmission method or a reflection method using a spectrometer (U-3310, Hitachi High-Tech. Corp.) with an integrating sphere attachment. A KBr pellet was used as the reference. Fluorescence spectra were measured with a spectrofluorometer (F-7000, Hitachi High-Tech. Corp.).

### Fluorescence lifetime measurements.

The fluorescence lifetime was measured using a lifetime spectrofluorometer (Fluorocube, Horiba Co., Ltd.) with a pulsed light emitting diode ( $\lambda = 370$  nm) as the excitation light source. A band-pass filter (600 nm) was used to remove the influence of the excitation light and the fluorescence from the porphyrin dye. The powder sample was placed in a quartz cell with a screw cap. The measurements were performed at room temperature.

### Cyclic voltammetry.

Cyclic voltammetry was performed using an automatic polarization system (HSV-100, Hokuto Denko Corp.) with a three-electrode configuration consisting of a Pt-wire working electrode ( $\varphi = 0.3$  mm), a Pt-wire counter electrode, and a commercially available Ag/AgCl electrode as a reference electrode. Porphyrins were dissolved in CH<sub>2</sub>Cl<sub>2</sub> containing 0.1 M tetrabutylammonium perchlorate (Strem Chemicals, Inc.) as a supporting electrolyte. Sample solutions were presaturated with N<sub>2</sub>, and the measurements were performed under N<sub>2</sub> atmosphere. The sweep rates were 50-100 mV/s. Redox potential values were calculated as the average of the anodic and cathodic peak potentials,  $(E_{pa} + E_{pc})/2$ , and converted to those versus normal hydrogen electrode (NHE).

### TEM observations

TEM observations and STEM-EDX analyses were performed at an acceleration voltage of 200 kV (JSM-ARM200F, JEOL Ltd.). The catalyst powder was dispersed on a Cu micro-grid (Nissin EM Corp.).

### **Preparation of GaN:ZnO electrodes**

The GaN:ZnO film electrodes were prepared by electrophoretic method on conducting glass (FTO, Asahi Glass Co.). The electrophoretic method was performed in an aqueous solution (50 ml) containing GaN:ZnO powder (40 mg), which was dispersed by sonication for 10 minutes. Two FTO electrodes (2×3 cm) were immersed parallel in the solution with 10 mm of distance, and then 50 V of bias was applied for 3 min using a DC power supply (GPR-11H30D, Good Will Instrument Co., Ltd.). The area of GaN:ZnO film was controlled to be ca. 2×2.5 cm. The average weight of GaN:ZnO deposited on FTO was 10 mg. The IrO<sub>2</sub> co-catalyst was loaded on the GaN:ZnO powder by an evaporation to dryness method with a Na<sub>2</sub>IrCl<sub>6</sub>•6H<sub>2</sub>O (Wako Pure Chemical Industry) aqueous solution. The electrode was dried and then calcined at 673 K for 1 h. After the IrO<sub>2</sub> loading, porphyrin3-solved pyridine solution (0.05 mM) was dropped on the IrO<sub>2</sub>-GaN:ZnO/FTO electrode and then dried at 400 K to evaporate the solvent.

### **Photoelectrochemical measurements**

The electrochemical cell used for photocurrent measurements consisted of the dye-modified GaN:ZnO electrode, a counter electrode (Pt wire), a Ag/AgCl reference electrode, and an electrolyte (0.1 M Na<sub>2</sub>SO<sub>4</sub> aqueous solution). The potential of the working electrode was controlled by the potentiostat (ECstat-300, EC Frontier Inc.). Sample solutions were presaturated with N<sub>2</sub>, and the measurements were performed under N<sub>2</sub> atmosphere. The electrodes were irradiated through the conducting glass by a Xe lamp (300 W, Cermex PE300UV, Perkin Elmer Inc.).

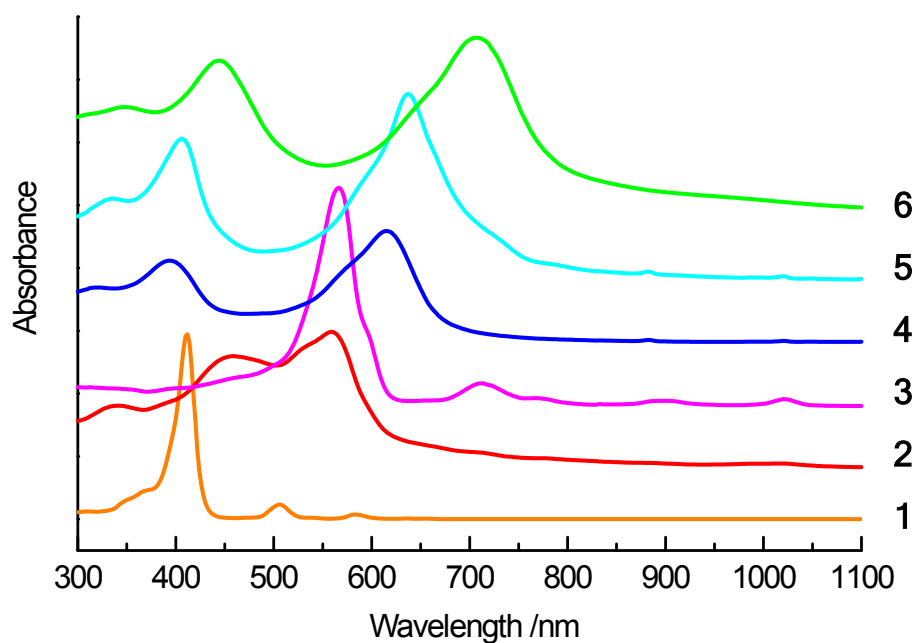

**Fig. S1** UV-vis absorption spectra for compounds **1-6** in CH<sub>2</sub>Cl<sub>2</sub> solvent.

**Table S1** Absorption maximum wavelengths and molar absorbance coefficients for synthesized porphyrin (**1**) and expanded porphyrins (**2-6**).

| Compound | $\lambda_{\text{max}}$ /nm | $\epsilon_{\text{max}}$ /M <sup>-1</sup> cm <sup>-1</sup> |
|----------|----------------------------|-----------------------------------------------------------|
| <b>1</b> | 410                        | $4.03 \times 10^4$                                        |
| <b>2</b> | 558                        | $6.37 \times 10^4$                                        |
| <b>3</b> | 566                        | $5.21 \times 10^5$                                        |
| <b>4</b> | 614                        | $4.90 \times 10^4$                                        |
| <b>5</b> | 638                        | $8.33 \times 10^4$                                        |
| <b>6</b> | 706                        | $8.45 \times 10^4$                                        |

### General information of the porphyrin-modified GaN:ZnO photocatalyst

The crystal structure of the GaN:ZnO powder was confirmed as a wurtzite structure by X-ray diffraction (XRD) measurements [Fig. S2(a)]. As previously reported,<sup>[1]</sup> diffraction peaks for GaN:ZnO were observed between the peaks attributed to ZnO and GaN [Fig. S2(b)]. The Ga:Zn ratio in the GaN:ZnO powder was determined by an energy dispersive X-ray spectroscopy (EDX) analyzer attached to a scanning electron microscope (VE-7800, KEYENCE Corp.) as 88:12. The specific surface area of the GaN:ZnO powder measured by using a B.E.T. surface area analyzer (BELLSORP-mini, Bell Japan Inc.) with N<sub>2</sub> adsorption was 2.3 m<sup>2</sup>g<sup>-1</sup>.

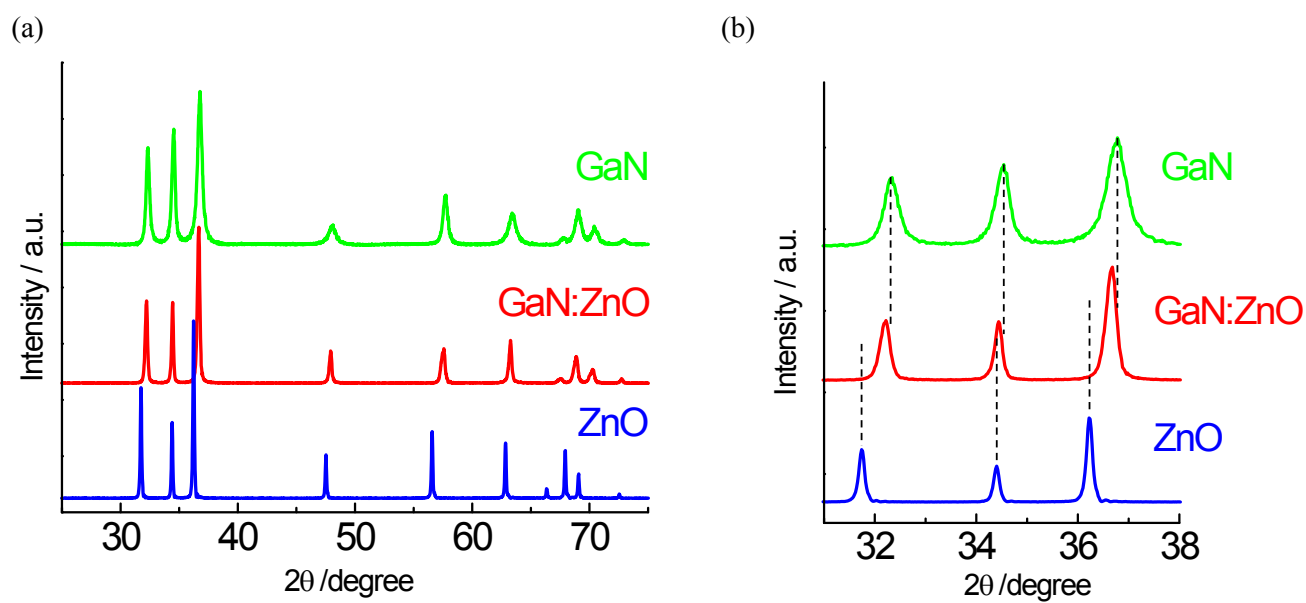

**Fig. S2** XRD patterns for ZnO, GaN, and GaN:ZnO solid solutions prepared in this study (a), and expanded figure (b).

#### Reference

[1] K. Maeda, K. Domen, *Chem. Mater.* **2010**, 22, 612.

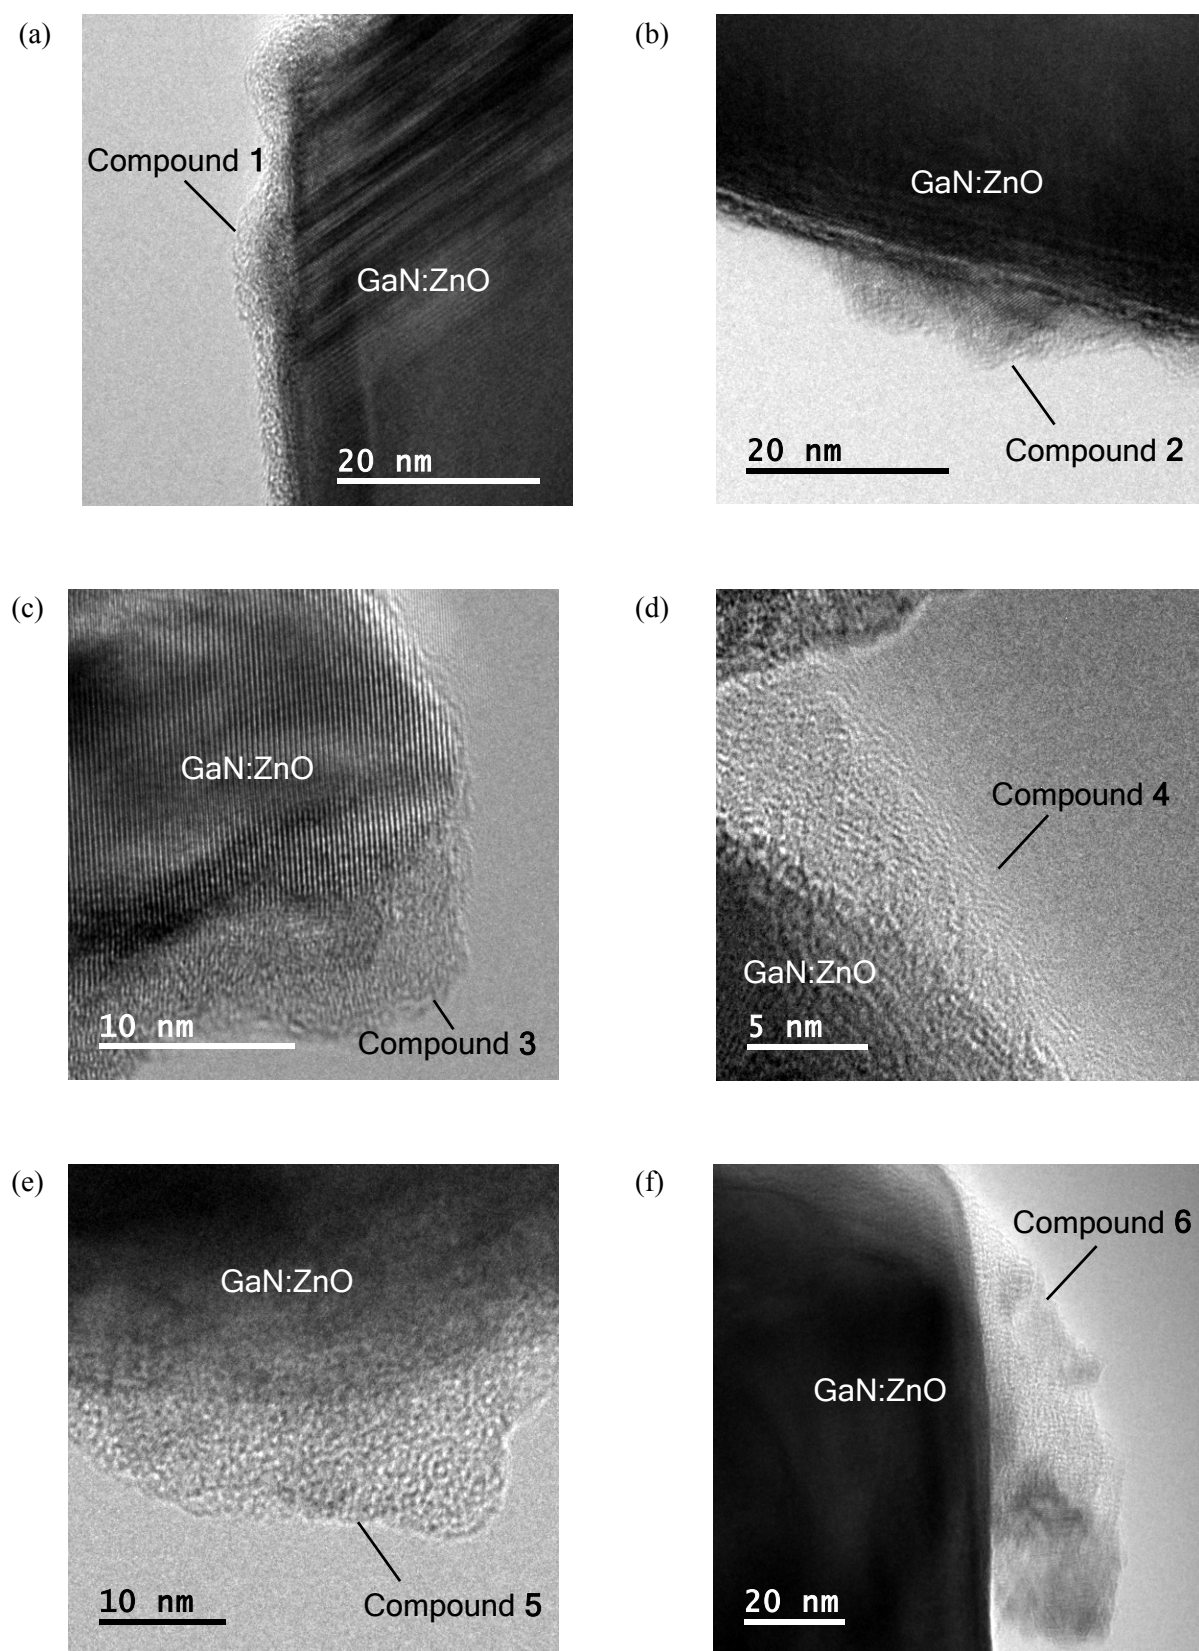

**Fig. S3** TEM images of (a) meso-tetrakis(pentafluorophenyl)porphyrin (compound 1), (b) N-fused pentaphyrin (compound 2), (c) meso-hexakis(pentafluorophenyl) [26] hexaphyrin (compound 3), (d) meso-heptakis(pentafluorophenyl) heptaphyrin (compound 4) (e) meso-octakis(pentafluorophenyl) octaphyrin (compound 5), and (f) meso-nonakis(pentafluorophenyl) nonaphyrin (compound 6) on IrO<sub>2</sub>-GaN:ZnO photocatalysts.

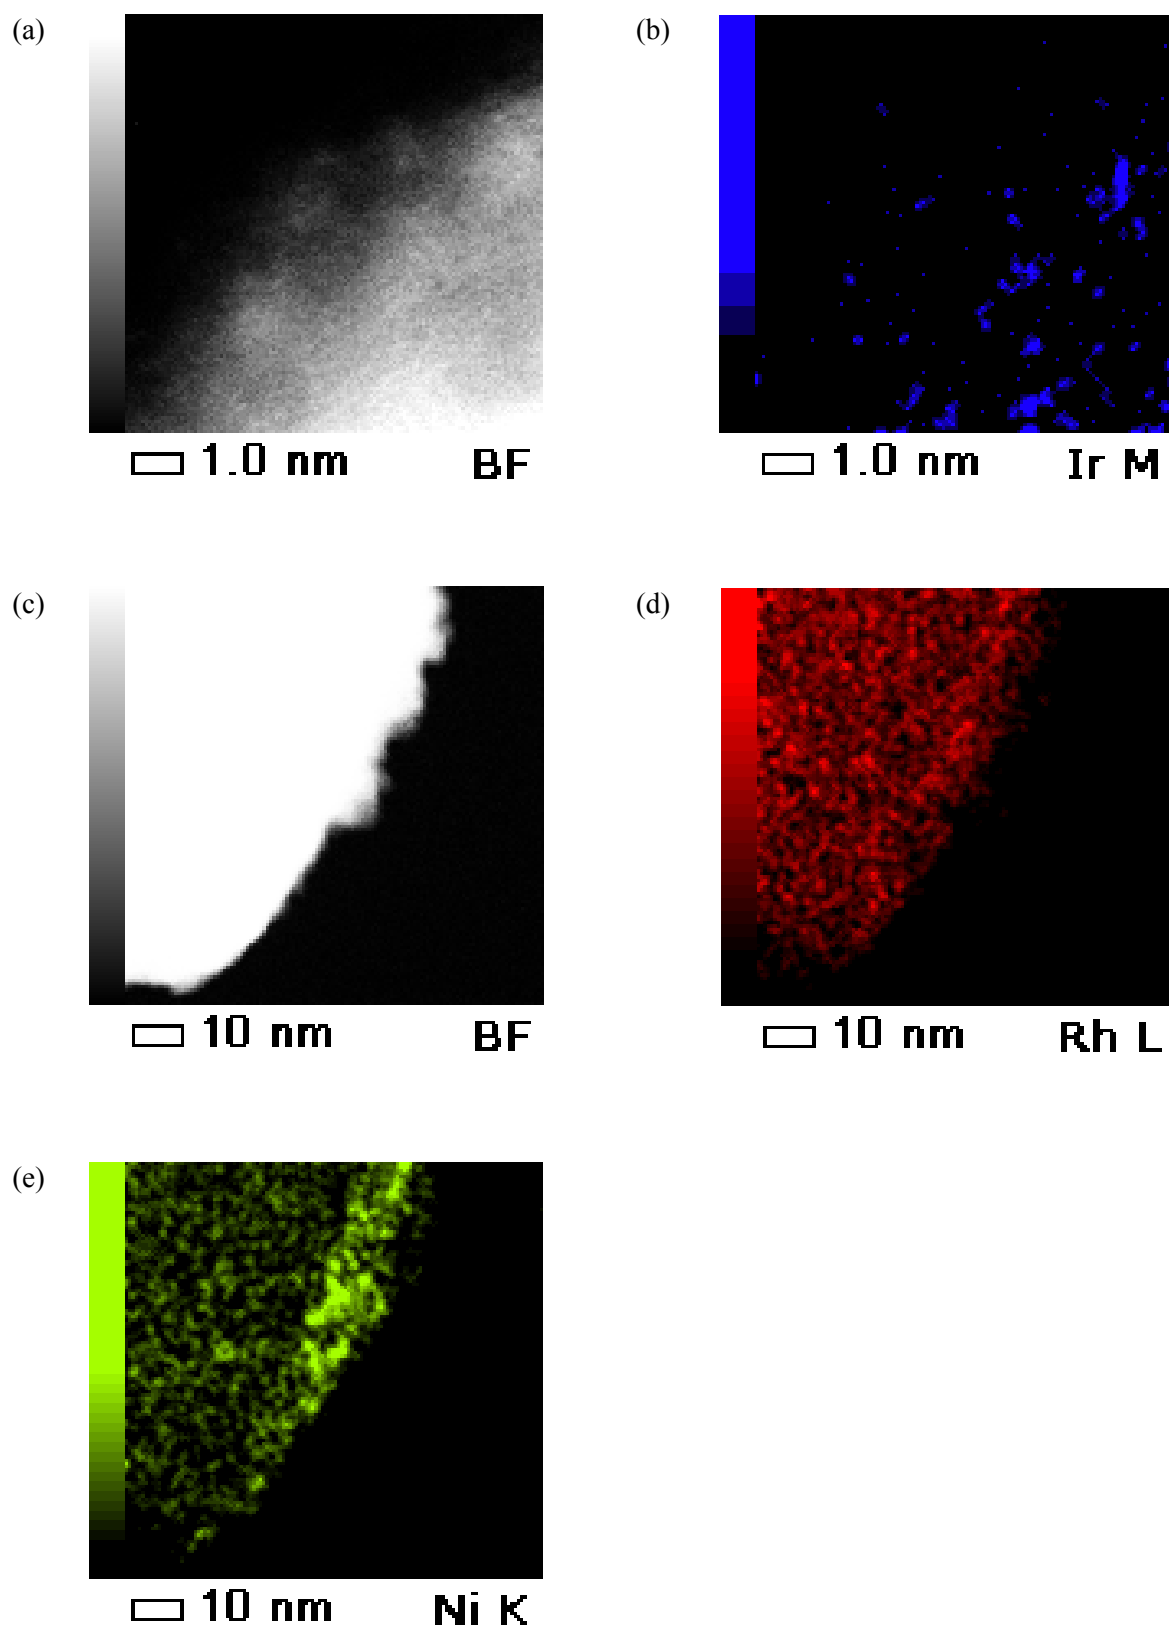

**Fig. S4** HAADF-STEM images and EDX mapping of Ir M shell (a, b), Rh L shell and Ni K shell (c-e) of Rh (0.1 wt%), NiO (0.1 wt%)/hexaphyrin **3** (0.5 wt%)/IrO<sub>2</sub>-GaN:ZnO photocatalysts.

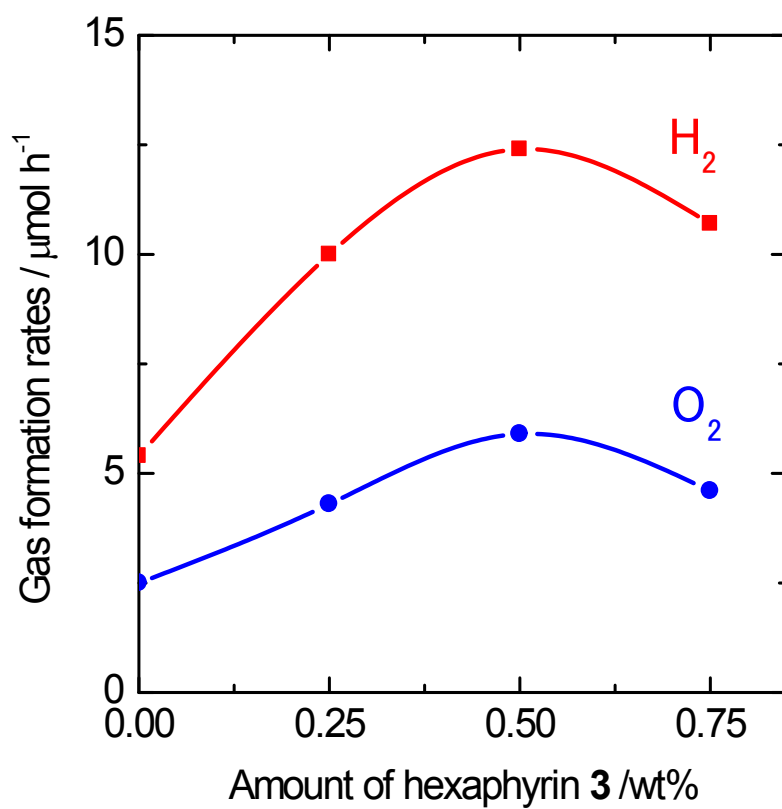

**Fig. S5** Dye amount dependency of the photocatalytic activity of hexaphyrin **3** modified GaN:ZnO photocatalysts.



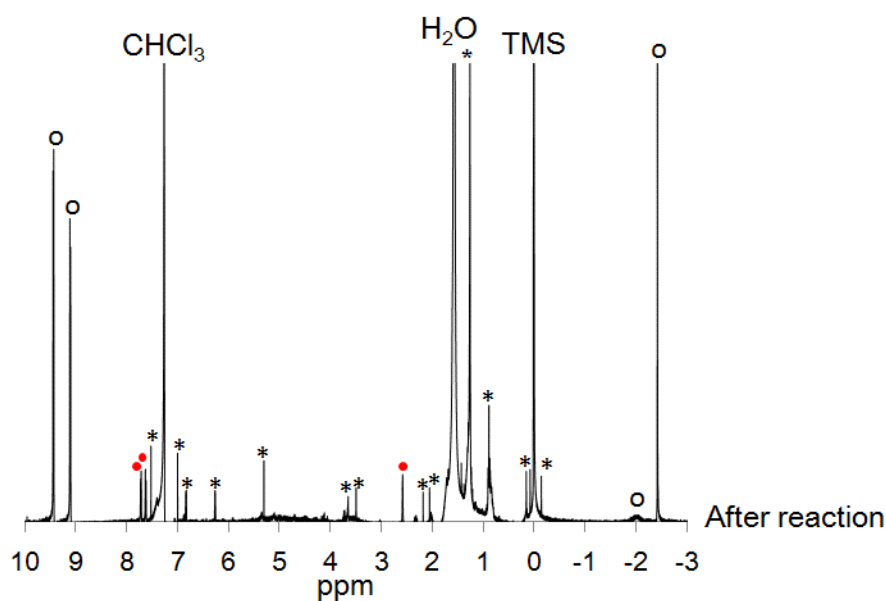

**Fig. S6**  $^1\text{H}$  NMR spectra of residual species of **3** after water splitting reaction. Asterisk denote impurities or spinning side band. Circle denote hexaphyrin. Closed circle denote new peaks after water splitting reaction.

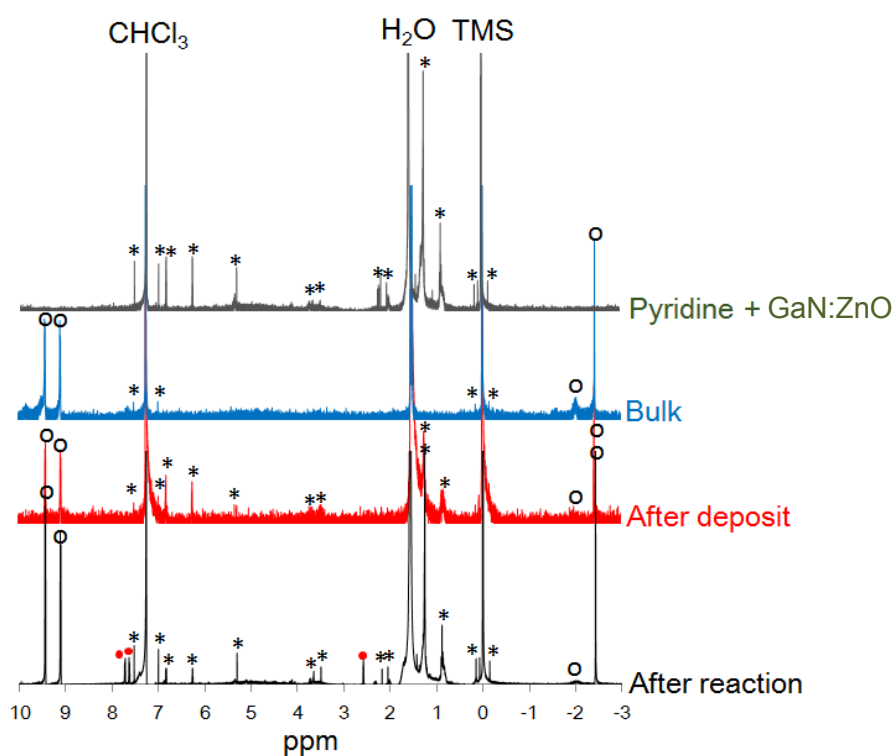

**Fig. S7**  $^1\text{H}$  NMR spectra of residual species of blank condition (green), bulk hexaphyrin **3** (blue), after deposit of hexaphyrin **3** by solution process (black), and after water splitting reaction (black). Asterisk denote impurities or spinning side band. Circle denote hexaphyrin peaks. Closed circle denote new peaks after water splitting reaction.

## NMR measurements

The  $^1\text{H}$ NMR were recorded on a Bruker AV400 (400 MHz). The  $^1\text{H}$  chemical shift was reported as  $\delta$  values (ppm) relative to tetramethylsilane (TMS).

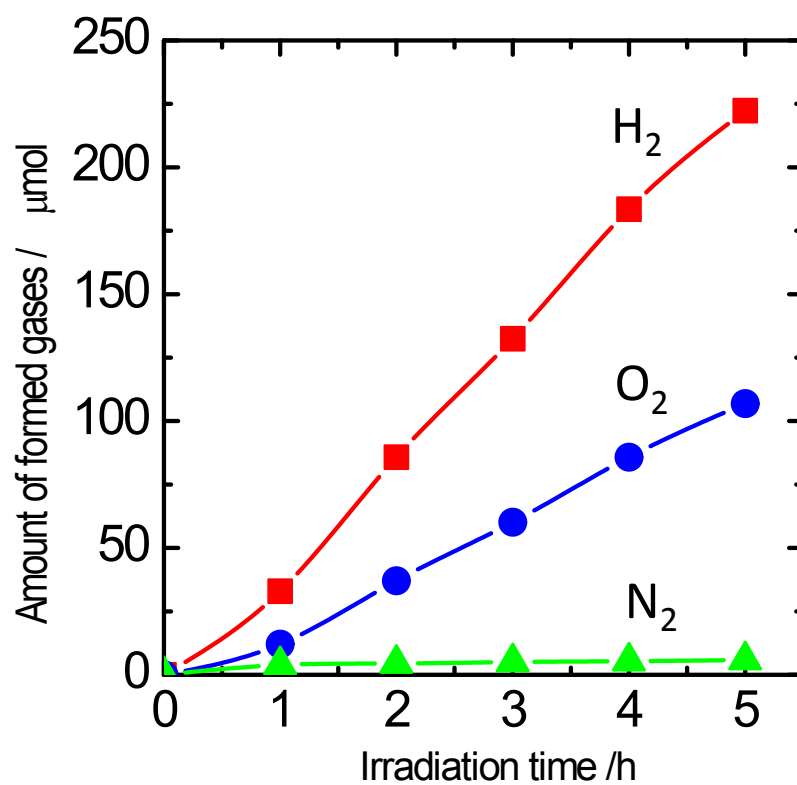

**Fig. S8** Amount of  $\text{H}_2$  and  $\text{O}_2$  formed on  $\text{RhO}_x$  (0.1 wt%),  $\text{NiO}$  (0.1 wt%)/hexaphyrin **3** (0.5wt%)/ $\text{IrO}_2$ (0.1 wt%)– $\text{GaN:ZnO}$  as a function of reaction time under a 300 W Xe lamp (Full arc).

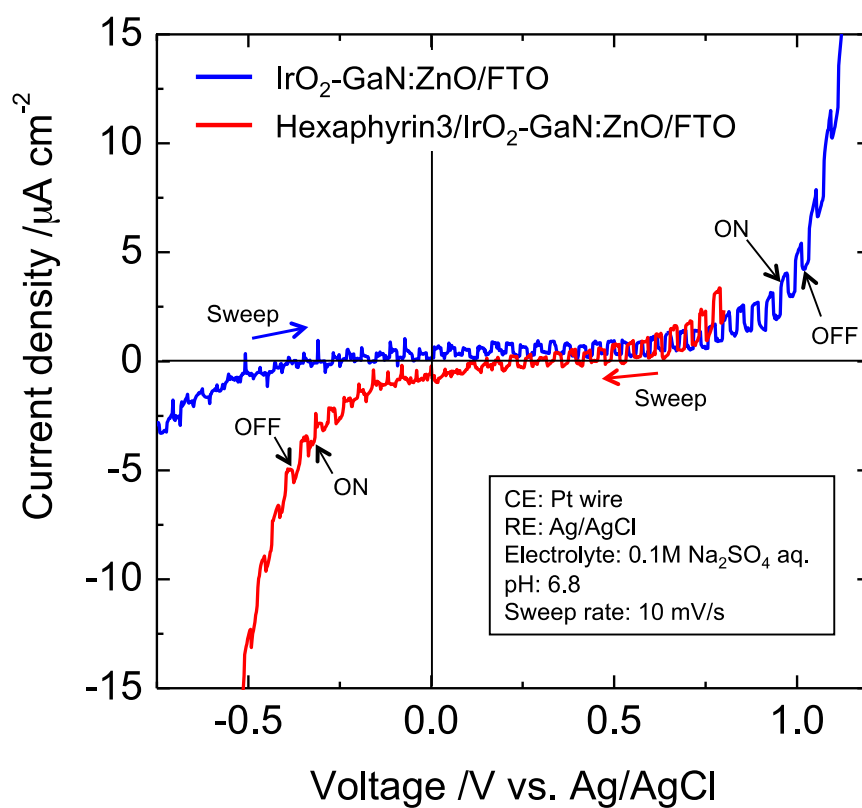

**Fig. S9** Photocurrent-potential characteristics of  $\text{IrO}_2\text{-GaN:ZnO}$  (blue) and hexaphyrin **3**/  $\text{IrO}_2\text{-GaN:ZnO}$  electrodes (red) measured (scan rate, 10 mV/s) with chopped light ( $300 \text{ mW/cm}^2$  Xe lamp, 0.5 Hz).
